# Supplementary material for: Synthesis, characterization, and growth simulations of Cu–Pt bimetallic nanoclusters
Source: publisher site journal article supplement (doi:10.3762/bjnano.5.150), 2014-08-27
Supplement: Additional file 1 [file 2190-4286-5-150-S1.pdf]

## Supporting Information

for

# Synthesis, characterization, and growth simulations of Cu–Pt bimetallic nanoclusters

Subarna Khanal<sup>1</sup>, Ana Spitale<sup>2</sup>, Nabraj Bhattarai<sup>1</sup>, Daniel Bahena<sup>1</sup>, J. Jesus Velazquez-Salazar<sup>1</sup>, Sergio Mejía-Rosales<sup>3</sup>, Marcelo M. Mariscal\*<sup>2</sup> and Miguel José-Yacamán\*<sup>1</sup>

Address: <sup>1</sup>Department of Physics and Astronomy, University of Texas at San Antonio, One UTSA Circle, 78249, San Antonio, Texas, USA; <sup>2</sup>INFIQC, CONICET, Departamento de Matemática y Física, Facultad de Ciencias Químicas, Universidad Nacional de Córdoba, (XUA5000) Córdoba, Argentina and <sup>3</sup>Center for Innovation and Research in Engineering and Technology, and CICFIM-Facultad de Ciencias Físico-Matemáticas, Universidad Autónoma de Nuevo León, San Nicolás de los Garza, NL 66450, México.

Email: Miguel José-Yacamán\* - [miguel.yacaman@utsa.edu](mailto:miguel.yacaman@utsa.edu);

Marcelo M. Mariscal\* - [marcelo.mariscal@conicet.gov.ar](mailto:marcelo.mariscal@conicet.gov.ar)

**Additional experimental data**

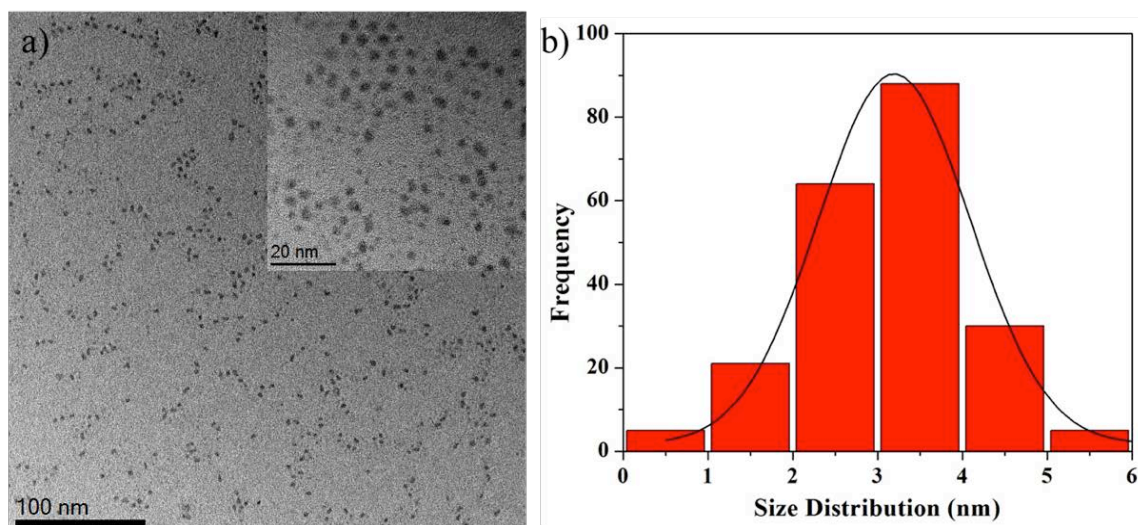

**Figure S1:** (a) Low magnification TEM image of Cu-Pt bimetallic nanoparticles. The inset in (a) shows the HTEM image, and (b) Size distribution histogram, the average diameter is  $3 \pm 0.5$  nm.

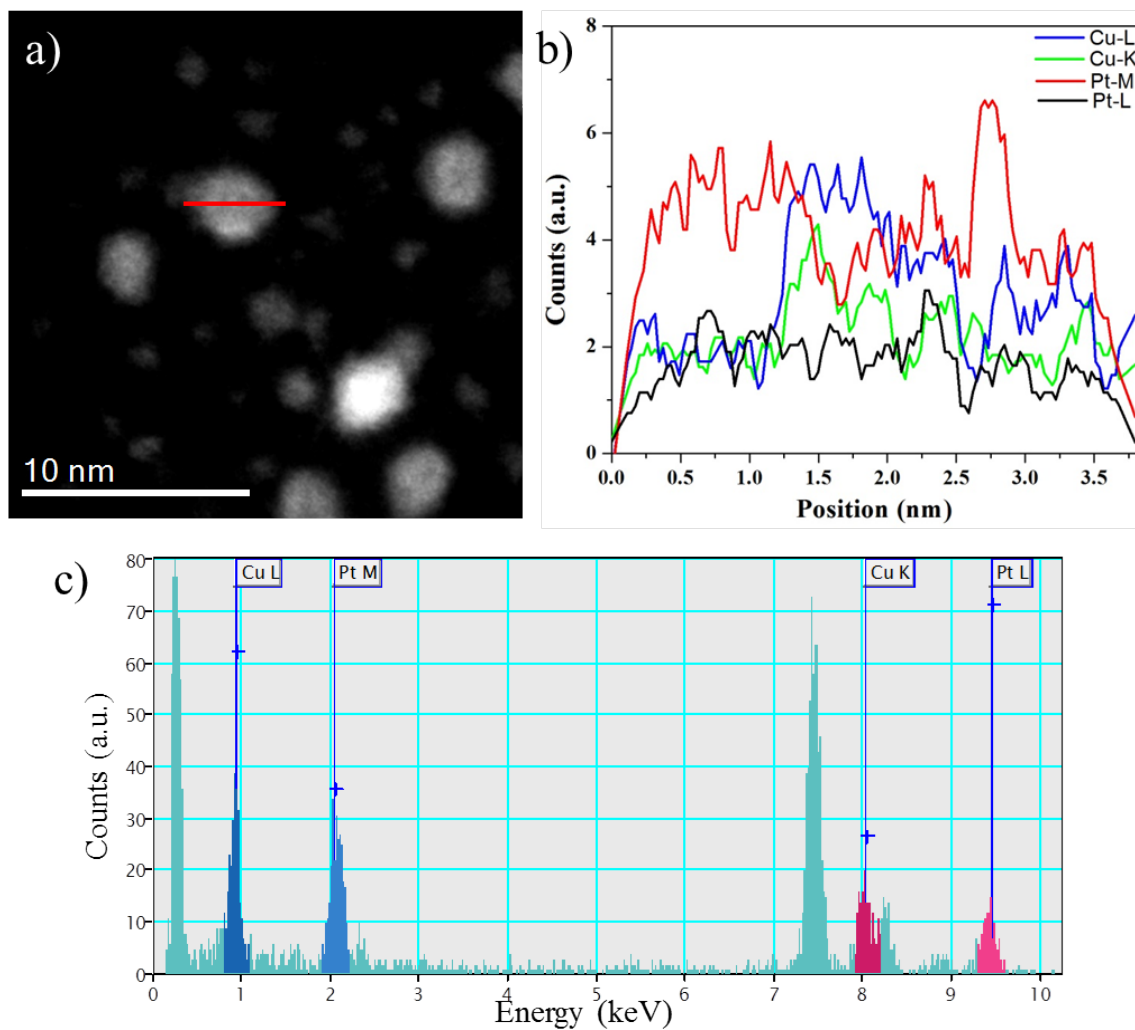

**Figure S2:** (a) HAADF-STEM image of Cu-Pt bimetallic nanoparticles, (b) Cu and Pt elemental line profiles along the red line across the nanostructure in (a), and (c) EDX spectrum of corresponding Cu-Pt bimetallic nanoparticles.

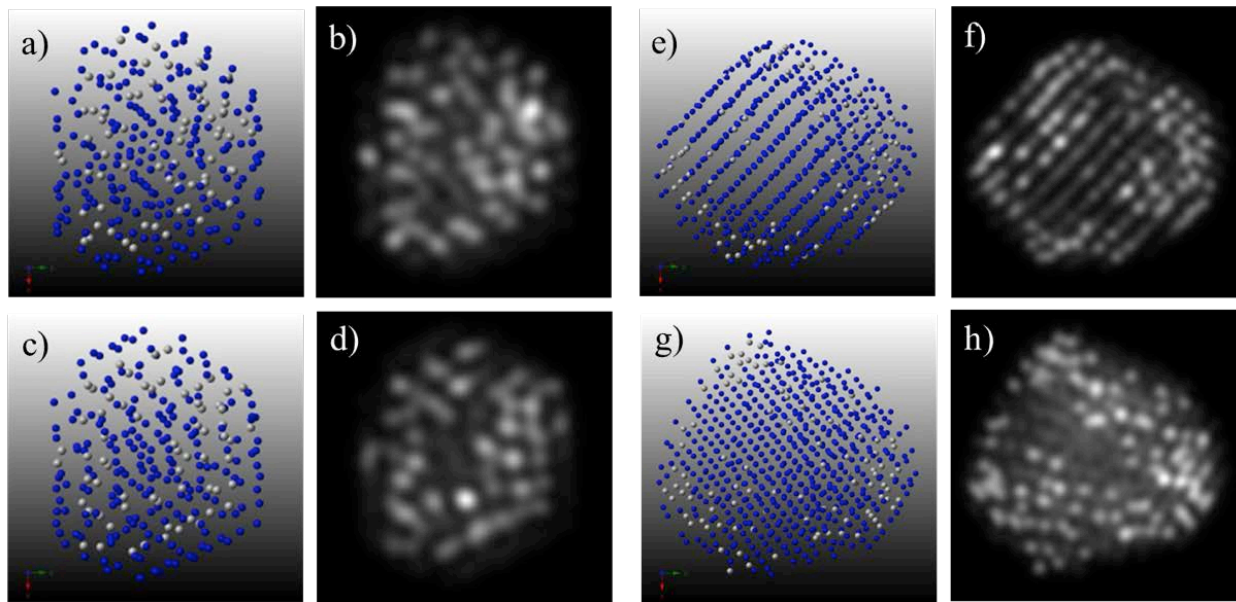

**Figure S3:** STEM simulated images of the final configurations shown in Figure 5. The structures (a, b) and (c, d) of  $\text{TO}_{201}$  particles were rotated  $60^\circ$  and  $90^\circ$  on y-axis. Similarly, the structures (e, f) and (g, h) of  $\text{TO}_{586}$  particles were rotated  $60^\circ$  and  $90^\circ$  on y-axis. Note how the regions enriched in Pt appears brighter.

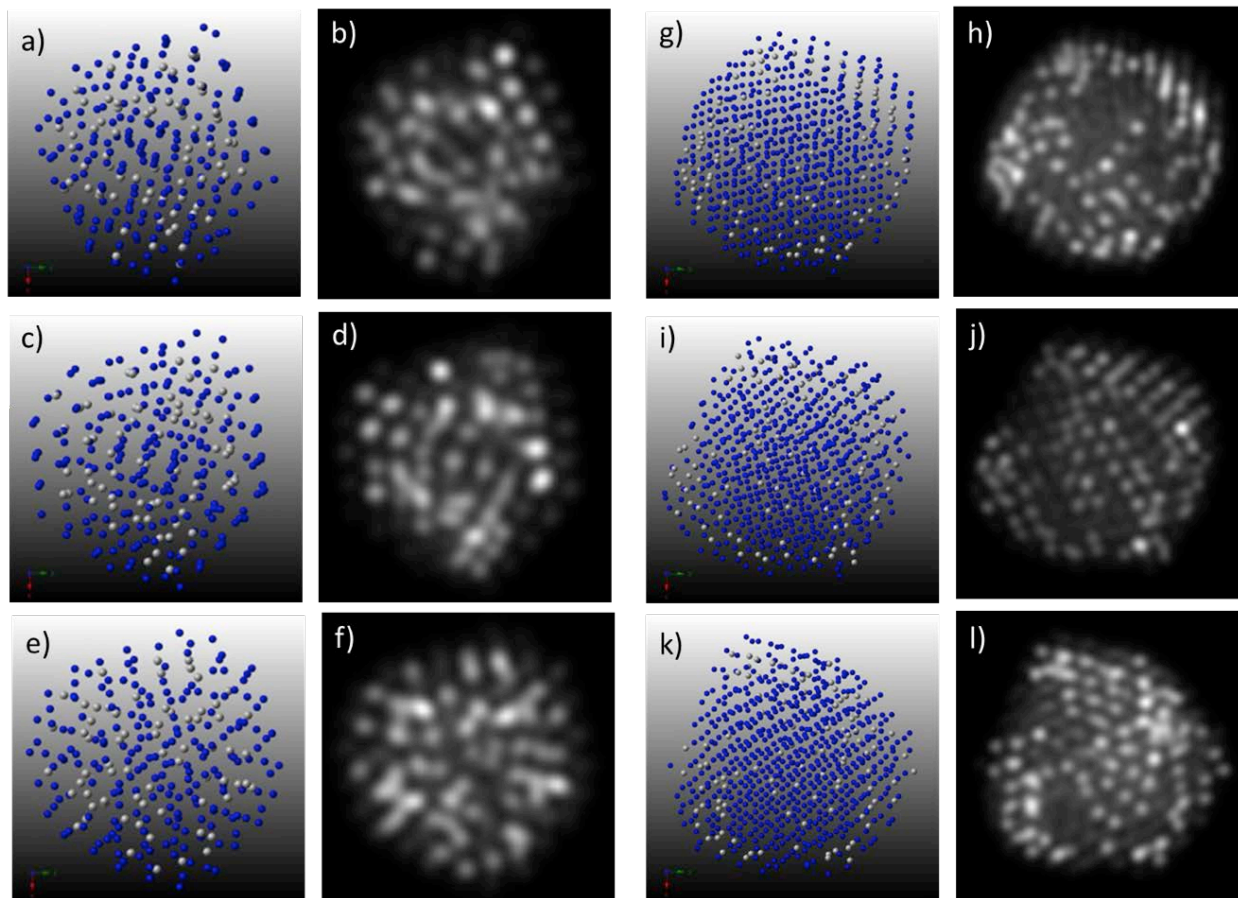

**Figure S4:** STEM simulated images of the final configurations shown in Figure 5. The structures (a, b), (c, d) and (e, f) of  $\text{TO}_{201}$  particles were rotated  $30^\circ$ ,  $60^\circ$  and  $90^\circ$  on x-axis. Similarly, the structures (g, h), (i, j) and (k, l) of  $\text{TO}_{586}$  particles were rotated  $30^\circ$ ,  $60^\circ$  and  $90^\circ$  on x-axis. Note how the regions enriched in Pt appears brighter.

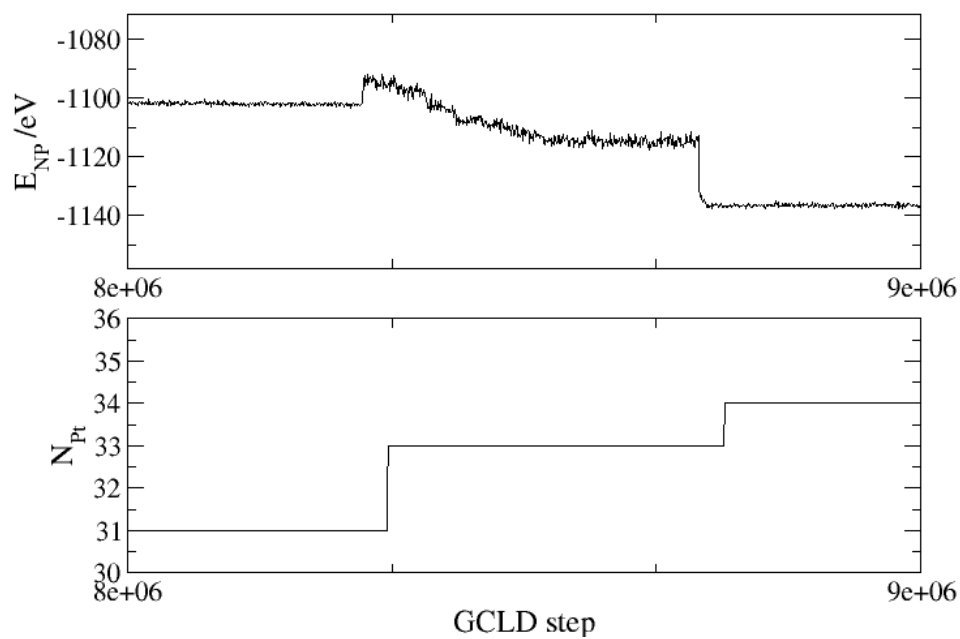

**Figure S5:** (top) Total energy of the nanoalloy as a function of GCLD steps, (lower) number of Pt atoms deposited on the Cu seed containing 201 atoms.

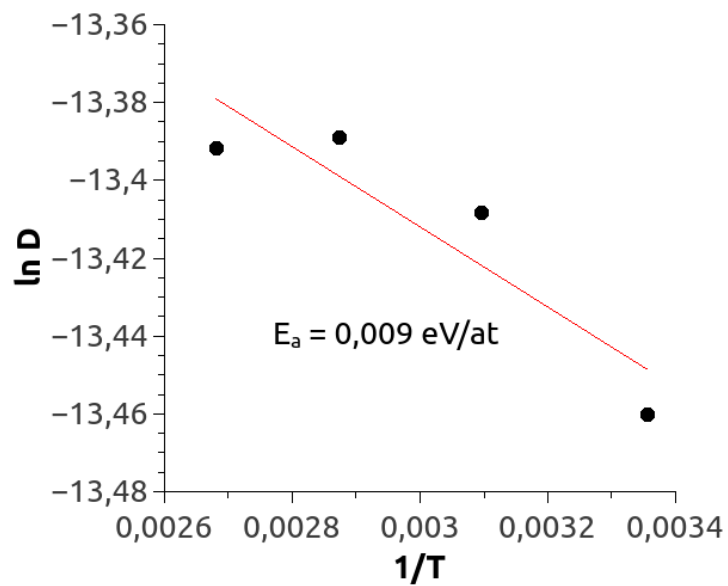

**Figure S6:** Diffusion coefficient calculated at different temperatures. From the linear regression fit, the activation energy for Pt diffusion in Cu is obtained.
